# Supplementary material for: Ecotoxicity of Concrete Containing Fine-Recycled Aggregate: Effect on Photosynthetic Pigments, Soil Enzymatic Activity and Carbonation Process
Source: MDPI journal article supplement (doi:10.3390/su14031732), 2022-02-02
Supplement: s1 [file s1]

# Supplementary material

To the manuscript “Ecotoxicity of Concrete Containing Fine-Recycled Aggregate: Effect on Photosynthetic Pigments, Soil Enzymatic Activity and Carbonation Process

**Diana Mariaková<sup>1,\*</sup>, Klára Anna Mocová<sup>2</sup>, Jan Pešta<sup>1,2</sup>, Kristina Fořtová<sup>1</sup>, Bhavna Tripathi<sup>3</sup>, Tereza Pavlu<sup>1</sup> and Petr Hájek<sup>1</sup>**

<sup>1</sup> Research Team Architecture and the Environment, University Centre for Energy Efficient Buildings of Czech Technical University in Prague, Trinecka 1024, 273 43 Bustehrad, Czech Republic; jan.pesta@cvut.cz (J.P.); kristina.fortova@cvut.cz (K.F.); tereza.pavlu@cvut.cz (T.P.); petr.hajek@fsv.cvut.cz (P.H.)

<sup>2</sup> Department of Environmental Chemistry, Faculty of Environmental Technology of University of Chemistry and Technology, Technická 5, 166 28 Prague, Czech Republic; klara.mocova@vscht.cz (K.A.M.)

<sup>3</sup> School of Civil and Chemical Engineering Manipal University Jaipur, Dehmi Kalan, Jaipur India; [bhavna.tripathi@jaipur.manipal.edu](mailto:bhavna.tripathi@jaipur.manipal.edu) (B.T.)

\* [diana.mariakova@cvut.cz](mailto:diana.mariakova@cvut.cz) (D.M.)

**Table S1.** pH of leachates (mean values  $\pm$  SD) at the end of duckweed toxicity test (after 7 days of exposition). 100+n - leachates (100 mL.L<sup>-1</sup>) amended with nutrients.

| Leachate<br>mL.L <sup>-1</sup> | I             |               |               | II            |               |               |
|--------------------------------|---------------|---------------|---------------|---------------|---------------|---------------|
|                                | NAC           | RMAC          | RCAC          | NAC           | RMAC          | RCAC          |
| 0                              | 6.0 $\pm$ 0.1 |
| 510                            | 7.9 $\pm$ 0.0 | 7.9 $\pm$ 0.0 | 7.9 $\pm$ 0.0 | 7.8 $\pm$ 0.0 | 7.8 $\pm$ 0.0 | 7.5 $\pm$ 0.0 |
| 640                            | 8.0 $\pm$ 0.1 | 8.1 $\pm$ 0.0 | 8.1 $\pm$ 0.0 | 8.0 $\pm$ 0.0 | 8.0 $\pm$ 0.0 | 8.0 $\pm$ 0.0 |
| 800                            | 8.3 $\pm$ 0.1 | 8.2 $\pm$ 0.1 | 8.3 $\pm$ 0.0 | 8.1 $\pm$ 0.0 | 8.2 $\pm$ 0.0 | 8.1 $\pm$ 0.0 |
| 1000                           | 8.3 $\pm$ 0.1 | 8.3 $\pm$ 0.1 | 8.4 $\pm$ 0.0 | 8.2 $\pm$ 0.0 | 8.4 $\pm$ 0.0 | 8.0 $\pm$ 0.1 |
| 100+n                          | 6.5 $\pm$ 0.0 | 6.5 $\pm$ 0.0 | 6.4 $\pm$ 0.0 | 6.3 $\pm$ 0.0 | 6.4 $\pm$ 0.0 | 6.3 $\pm$ 0.0 |

**Table S2.** The results of the water flea toxicity tests. Mean ( $\pm$ SD) values of immobilization (%). 100+n - leachates (100 mL.L<sup>-1</sup>) amended with nutrients. The letters indicate significant differences between values (posthoc test;  $\alpha$  = 0.05) within the same column (uppercase) and within the same row (lowercase) and the asterisks indicate differences between sample and control (zero values).

| mL.L <sup>-1</sup> | I   |                   |      |                   |      |                   | II  |                   |      |                  |      |                   |
|--------------------|-----|-------------------|------|-------------------|------|-------------------|-----|-------------------|------|------------------|------|-------------------|
|                    | NAC |                   | RMAC |                   | RCAC |                   | NAC |                   | RMAC |                  | RCAC |                   |
| 640                | B   | 3.3 $\pm$ 7.5 a   | B    | 0.0 $\pm$ 0.0 a   | B    | 4.0 $\pm$ 8.9 a   | BC  | 4.0 $\pm$ 8.9 a   | B    | 0.0 $\pm$ 0.0 a  | B    | 1.4 $\pm$ 4.2 a   |
| 800                | B   | 7.3 $\pm$ 10.1 b  | B    | 2.5 $\pm$ 5.6 b   | B    | 2.9 $\pm$ 6.4 b   | A*  | 35.0 $\pm$ 18.1 a | B    | 2.9 $\pm$ 6.4 b  | B    | 10.1 $\pm$ 12.5 b |
| 1000               | A*  | 76.8 $\pm$ 19.2 a | A*   | 86.0 $\pm$ 14.2 a | A*   | 34.6 $\pm$ 14.9 a | AB* | 19.7 $\pm$ 5.2 a  | A*   | 53.3 $\pm$ 9.2 a | A*   | 32.7 $\pm$ 13.0 a |
| 100+n              | B   | 4.0 $\pm$ 8.9 a   | B    | 0.0 $\pm$ 0.0 a   | B    | 8.0 $\pm$ 11.0 a  | C   | 0.0 $\pm$ 0.0 a   | B    | 5.0 $\pm$ 9.3 a  | B    | 0.0 $\pm$ 0.0 a   |

**Table S3.** The results of algae toxicity tests. Mean ( $\pm$ SD) values of inhibition/stimulation (%) of growth rate based on optical density at 750 nm. 100+n - leachates (100 mL.L<sup>-1</sup>) amended with nutrients. Negative values indicate growth stimulation. The letters indicate significant differences between values (posthoc test;  $\alpha$  = 0.05) within the same column (uppercase) and within the same row (lowercase) and the asterisks indicate differences between sample and control (zero values).

| mL.L <sup>-1</sup> | I   |                  |      |                  |      |                   | II  |                   |      |                   |      |                   |
|--------------------|-----|------------------|------|------------------|------|-------------------|-----|-------------------|------|-------------------|------|-------------------|
|                    | NAC |                  | RMAC |                  | RCAC |                   | NAC |                   | RMAC |                   | RCAC |                   |
| 640                | B   | -5.7 $\pm$ 9.8 a | B    | -7.7 $\pm$ 5.8 a | B*   | -13.9 $\pm$ 2.1 a | B   | -6.6 $\pm$ 0.8 a  | B*   | -12.2 $\pm$ 4.4 a | B    | -9.5 $\pm$ 12.4 a |
| 800                | B   | -3.6 $\pm$ 6.9 a | B    | -3.8 $\pm$ 9.6 a | B    | -4.7 $\pm$ 4.7 a  | B   | -5.8 $\pm$ 13.6 a | B    | -7.4 $\pm$ 10.5 a | B*   | -14.4 $\pm$ 7.8 a |
| 1000               | A*  | 25.9 $\pm$ 1.1 a | A*   | 36.8 $\pm$ 2.0 a | A*   | 28.5 $\pm$ 1.4 a  | A*  | 32.7 $\pm$ 0.8 a  | A*   | 30.6 $\pm$ 0.4 a  | A*   | 19.3 $\pm$ 1.1 a  |
| 100+n              | B   | -0.2 $\pm$ 1.5 a | B    | -4.8 $\pm$ 2.3 a | B    | -1.1 $\pm$ 1.0 a  | B   | 1.1 $\pm$ 6.1 a   | B    | -0.1 $\pm$ 3.9 a  | AB   | -0.4 $\pm$ 3.1 a  |

**Table S4.** The results of duckweed toxicity tests. Mean ( $\pm$ SD) values of inhibition/stimulation (%) of the growth rate based on the total area of the frond. 100+n - leachates (100 mL.L<sup>-1</sup>) amended with nutrients. Negative values indicate growth stimulation.

The letters indicate significant differences between values (posthoc test;  $\alpha = 0.05$ ) within the same column (uppercase) and within the same row (lowercase) and the asterisks indicate differences between sample and control (zero values).

| mL.L <sup>-1</sup> | I   |              |      |                |      |              | II  |              |      |              |      |               |
|--------------------|-----|--------------|------|----------------|------|--------------|-----|--------------|------|--------------|------|---------------|
|                    | NAC |              | RMAC |                | RCAC |              | NAC |              | RMAC |              | RCAC |               |
| 510                | C   | 1.2 ± 7.5 a  | C    | -0.4 ± 12.6 a  | C    | -1.5 ± 5.1 a | CD  | 6.3 ± 2.4 a  | C    | -3.4 ± 4.2 a | C    | -4.5 ± 7.5 a  |
| 640                | C   | 9.9 ± 9.6 a  | BC   | 18.9 ± 5.4 a   | C    | 12.0 ± 8.9 a | C*  | 14.9 ± 0.9 a | BC   | 0.4 ± 1.3 a  | BC   | 8.5 ± 1.2 a   |
| 800                | B*  | 41.5 ± 5.6 a | B*   | 25.5 ± 14.4 ab | B*   | 37.9 ± 4.3 a | B*  | 40.6 ± 4.7 a | B*   | 15.6 ± 3.9 b | B*   | 25.4 ± 8.8 ab |
| 1000               | A*  | 67.8 ± 1.5 a | A*   | 70.7 ± 1.4 a   | A*   | 59.5 ± 7.6 a | A*  | 75.2 ± 3.0 a | A*   | 71.0 ± 4.9 a | A*   | 63.0 ± 2.5 a  |
| 100+n              | C   | -3.6 ± 4.6 a | C    | -0.5 ± 14.4 a  | C    | -2.3 ± 4.3 a | D   | -5.5 ± 3.2 a | C    | -4.2 ± 3.0 a | C    | -1.4 ± 2.7 a  |

**Table S5.** pH (mean values ± SD) measured in soils amended with leachates after 7, 28, and 56 days.

| time (d) | CT  | I   |      |      | II  |      |      |
|----------|-----|-----|------|------|-----|------|------|
|          |     | NAC | RMAC | RCAC | NAC | RMAC | RCAC |
| 7        | 5.6 | 6.0 | 5.9  | 6.0  | 5.7 | 6.0  | 5.7  |
| 28       | 5.5 | 5.5 | 5.5  | 5.5  | 5.3 | 5.4  | 5.3  |
| 56       | 5.5 | 5.3 | 5.6  | 5.3  | 5.4 | 5.3  | 5.3  |
